# Supplementary material
Source: PubMed Central journal article supplement (PMC3494347)
Supplement: supp_120392_primer-warner-1-at.pdf [file supp_120392_primer-warner-1-at.pdf]

## **Appendix 1 (as supplied by the authors): Resources for patients and physicians**

### *Physician resources*

#### **Risk triage**

- 1) Breast Cancer Risk Assessment Tool (<http://www.cancer.gov/bcrisktool/>)
- 2) IBIS breast cancer risk evaluation tool (<http://www.ems-trials.org/riskevaluator/>)
- 3) June C. Carroll, Ruth Heisey, and Ellen Warner. Family history and breast cancer. *CMAJ* 2012 Jan. 30 [Epub ahead of print.] DOI:10.1503/cmaj.111670

#### **Concise review of evidence for and controversies surrounding breast screening**

- 4) Ellen Warner. Breast cancer screening. *New Engl J Med* (Sept. 15) 2011;365:1025-32.

#### **Joint decision-making**

- 5) Angela Fagerlin, Brian J. Zikmund-Fisher, Pater A. Ubel. Helping patients decide: Ten steps to better risk communication. *J Natl Cancer Inst* 2011;103:1436-43.

### *Patient resources*

#### **A tailored approach to the discussion of breast cancer risk factors, prevention and screening**

Breast cancer in your family: what you need to know  
([http://www.willow.org/assets/u/Hereditary\\_V7.pdf](http://www.willow.org/assets/u/Hereditary_V7.pdf))
